# Supplementary material for: Nutrient and Growth Response of Fagus sylvatica L. Saplings to Drought Is Modified by Fertilisation
Source: MDPI journal article supplement (doi:10.3390/f14122445), 2023-12-14
Supplement: s1 [file s1]

**Table S1.** Main effects of irrigation (regular watering vs. induced drought), fertilisation (high dose vs. low dose of fertiliser) and its interaction (irrigation x fertilisation) on nitrogen (N), phosphorus (P) and potassium (K) foliar concentration in the drought and post-drought period, as calculated with two-way ANOVA. F values for the factors and their interactions are shown; statistical significance is indicated as \* $p < 0.05$ ; \*\* $p < 0.01$ ; \*\*\* $p < 0.001$ ; ns, not significant.

| Foliar concentrations | Irrigation | Fertilisation | Irrigation x fertilisation |
|-----------------------|------------|---------------|----------------------------|
| Drought period        |            |               |                            |
| N                     | 19.95***   | 18.08***      | 0.05ns                     |
| P                     | 5.55*      | 7.74**        | 0.01ns                     |
| K                     | 3.90ns     | 0.25ns        | 0.07ns                     |
| Post - drought period |            |               |                            |
| N                     | 38.05***   | 10.34***      | 0.00ns                     |
| P                     | 3.97ns     | 1.46ns        | 5.55*                      |
| K                     | 44.64***   | 6.87*         | 0.00ns                     |

**Table S2.** Main effects of irrigation (regular watering vs. induced drought), fertilisation (high dose vs. low dose of fertiliser) and its interaction (irrigation x fertilisation) on nitrogen (N), phosphorus (P) and potassium (K) root concentration, at the end of the experiment., as calculated with two-way ANOVA. F values for the factors and their interactions are shown; statistical significance is indicated as \* $p < 0.05$ ; \*\* $p < 0.01$ ; \*\*\* $p < 0.001$ ; ns, not significant.

|          | Irrigation | Fertilisation | Irrigation x fertilisation |
|----------|------------|---------------|----------------------------|
| N (mg/g) | 1.16ns     | 25.66***      | 0.85ns                     |
| P (mg/g) | 7.1**      | 22.95***      | 0.71ns                     |
| K (mg/g) | 5.93*      | 15.6***       | 2.92ns                     |

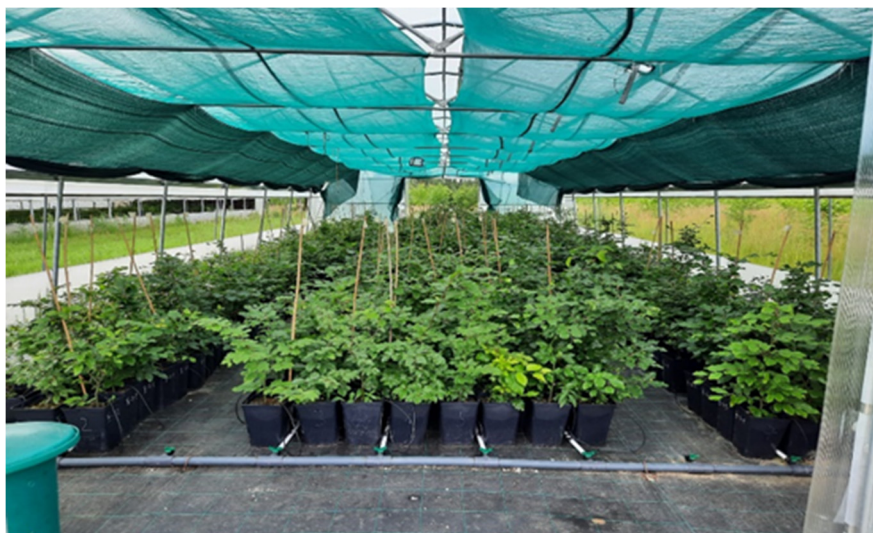

**Figure S1.** Pot experiment in the greenhouse

|    |    |    |    |    |    |    |    |
|----|----|----|----|----|----|----|----|
| DL | DH | DL | DH | WL | WH | WL | WH |
| DH | DL | DH | DL | WH | WL | WH | WL |
| DL | DH | DL | DH | WL | WH | WL | WH |
| DH | DL | DH | DL | WH | WL | WH | WL |

**Figure S2.** Experimental design layout of the greenhouse pot experiment using a latin square arrangement
